# Supplementary material for: The Dynamic Interest in Topics within the Biomedical Scientific Community
Source: PLoS One. 2009 Aug 7;4(8):e6544. doi: 10.1371/journal.pone.0006544 (PMC2721680; doi:10.1371/journal.pone.0006544)
Supplement: Dataset S2 — Scientific output on topics derived from Gordon Research Conference meetings and additional signaling pathways (0.35 MB XLS) [file pone.0006544.s004.xls]

## Sheet: Gordon conference 200 topics
Gordon research conferences (biology) 2000 topics
		(aging)				(bacterial cell surface)				(basement membrane)				(bioelectrochemistry)				Biological Regulatory Mechanisms				cancer genetics				cancer & epigenetics				Cardiac Regulatory Mechanisms				Neuron & cell biology				cellular & molecular mycology				Chemotactic cytokines				chemotherapy & cancer
	year	all items on aging	reviews on aging	pub/rev ratio	year	all items	reviews	pub/rev ratio	year	all items	reviews	pub/rev ratio	year	all items	reviews	pub/rev ratio	year	all items	reviews	pub/rev ratio	year	all items	reviews	pub/rev ratio	year	all items	reviews	pub/rev ratio	year	all items	reviews	pub/rev ratio	year	all items	reviews	pub/rev ratio	year	all items	reviews	pub/rev ratio	year	all items	reviews	pub/rev ratio	year	all items	reviews	pub/rev ratio	year
	1957	351	0	0	1957	0	0	#DIV/0!	1957	3	0	#DIV/0!	1957	0	0	#DIV/0!	1957	0	0	#DIV/0!	1957	0	0	#DIV/0!	1957			#DIV/0!	1957	0	0	#DIV/0!	1957	0	0	#DIV/0!	1957	7	0	#DIV/0!	1957	0	0	#DIV/0!	1957	95	0	#DIV/0!	1957
	1962	539	0	0	1962	0	0	#DIV/0!	1962	8	0	#DIV/0!	1962	0	0	#DIV/0!	1962	0	0	#DIV/0!	1962	0	0	#DIV/0!	1962	0	0	#DIV/0!	1962	0	0	#DIV/0!	1962	0	0	#DIV/0!	1962	94	0	#DIV/0!	1962	0	0	#DIV/0!	1962	186	0	#DIV/0!	1962
	1967	1408	54	26.0741	1967	0	0	#DIV/0!	1967	206	5	41.2	1967	0	0	#DIV/0!	1967	0	0	#DIV/0!	1967	0	0	#DIV/0!	1967	0	0	#DIV/0!	1967	0	0	#DIV/0!	1967	0	0	#DIV/0!	1967	312	5	62.4	1967	0	0	#DIV/0!	1967	1915	67	28.5821	1967
	1972	1203	82	14.6707	1972	2	2	1	1972	541	32	16.9062	1972	0	0	#DIV/0!	1972	0	0	#DIV/0!	1972	0	0	#DIV/0!	1972	0		#DIV/0!	1972	0	0	#DIV/0!	1972	0	0	#DIV/0!	1972	1594	65	24.5231	1972	0	0	#DIV/0!	1972	2833	188	15.0691	1972
	1977	1822	85	21.4353	1977	1	0	#DIV/0!	1977	495	33	15	1977	0	0	#DIV/0!	1977	0	0	#DIV/0!	1977	0	0	#DIV/0!	1977	0	0	#DIV/0!	1977	7	0	#DIV/0!	1977	0	0	#DIV/0!	1977	1177	52	22.6346	1977	10	1	10	1977	3744	221	16.9412	1977
	1982	3714	203	18.2956	1982	5	0	#DIV/0!	1982	653	50	13.06	1982	0	0	#DIV/0!	1982	0	0	#DIV/0!	1982	0	0	#DIV/0!	1982	2	0	#DIV/0!	1982	2	1	2	1982	2	1	2	1982	1475	85	17.3529	1982	39	4	9.75	1982	5381	312	17.2468	1982
	1987	4052	344	11.7791	1987	4	1	4	1987	825	57	14.4737	1987	1	0	#DIV/0!	1987	0	0	#DIV/0!	1987	9	2	4.5	1987	5	0	#DIV/0!	1987	8	3	2.66667	1987	59	4	14.75	1987	3245	203	15.9852	1987	72	7	10.2857	1987	7607	682	11.154	1987
	1992	5698	751	7.58722	1992	20	2	10	1992	1043	119	8.76471	1992	0	0	#DIV/0!	1992	0	0	#DIV/0!	1992	34	3	11.3333	1992	12	0	#DIV/0!	1992	20	8	2.5	1992	300	41	7.31707	1992	8052	663	12.1448	1992	230	37	6.21622	1992	10073	1683	5.98515	1992
	1997	6841	1197	5.71512	1997	27	2	13.5	1997	940	109	8.62385	1997	4	0	#DIV/0!	1997	0	0	#DIV/0!	1997	105	27	3.88889	1997	83	18	4.61111	1997	25	4	6.25	1997	398	46	8.65217	1997	10569	967	10.9297	1997	451	38	11.8684	1997	12054	1384	8.70954	1997
	2002	8272	1574	5.2554	2002	30	5	6	2002	817	93	8.78495	2002	148	7	21.1429	2002	0	0	#DIV/0!	2002	192	42	4.57143	2002	348	71	4.90141	2002	39	16	2.4375	2002	534	109	4.89908	2002	14124	1642	8.60171	2002	473	41	11.5366	2002	17718	4138	4.28178	2002
	2007	11301	2047	5.52076	2007	33	4	8.25	2007	945	129	7.32558	2007	148	1	148	2007	3	0	#DIV/0!	2007	337	59	5.71186	2007	1702	329	5.17325	2007	44	12	3.66667	2007	669	130	5.14615	2007	21004	1816	11.5661	2007	434	44	9.86364	2007	26763	5895	4.53995	2007
						"1957/01/01"[Publication Date] : "1957/12/31"[Publication Date] AND "bacterial cell surface"								"1962/01/01"[Publication Date] : "1962/12/31"[Publication Date] AND "bioelectrochemistry"				"1962/01/01"[Publication Date] : "1962/12/31"[Publication Date] AND "bioelectrochemistry"				"2007/01/01"[Publication Date] : "2007/12/31"[Publication Date] AND "cancer genetics"				"1997/01/01"[Publication Date] : "1997/12/31"[Publication Date] AND (cancer AND epigenetics)				"2007/01/01"[Publication Date] : "2007/12/31"[Publication Date] AND (Cardiac AND "Regulatory Mechanisms")				"1987/01/01"[Publication Date] : "1987/12/31"[Publication Date] AND (Neuron AND "cell biology")				"2007/01/01"[Publication Date] : "2007/12/31"[Publication Date] AND ((cellular OR molecular) AND mycology)				"2007/01/01"[Publication Date] : "2007/12/31"[Publication Date] AND (chemotactic AND cytokines)				"1957/01/01"[Publication Date] : "1962/12/31"[Publication Date] AND (chemotherapy AND cancer)
Search term		"1957/01/01"[Publication Date] : "1957/12/31"[Publication Date] AND "aging"								"1962/01/01"[Publication Date] : "1962/12/31"[Publication Date] AND "basement membrane"
[truncated: 203 more columns]

## Sheet: GCF topics part 2
Gordon research conferences (biology) 2000 part 2
		thrombolysis				vascular cell biology				visual system & development
	year	all items	reviews	pub/rev ratio	year	all items	reviews	pub/rev ratio	year	all items	reviews	pub/rev ratio
	1957	0	0	#DIV/0!	1957	0	0	#DIV/0!	1957	0	0	#DIV/0!
	1962	6	0	#DIV/0!	1962	0	0	#DIV/0!	1962	0		#DIV/0!
	1967	7	0	#DIV/0!	1967	0	0	#DIV/0!	1967	1		#DIV/0!
	1972	14	0	#DIV/0!	1972	0	0	#DIV/0!	1972	0	0	#DIV/0!
	1977	15	0	#DIV/0!	1977	0	0	#DIV/0!	1977	7	0	#DIV/0!
	1982	63	2	31.5	1982	0	0	#DIV/0!	1982	17	1	17
	1987	252	41	6.14634	1987	0	0	#DIV/0!	1987	29	4	7.25
	1992	431	84	5.13095	1992	12	1	12	1992	33	10	3.3
	1997	506	86	5.88372	1997	3	0	#DIV/0!	1997	44	11	4
	2002	598	114	5.24561	2002	11	4	2.75	2002	62	18	3.44444
	2007	695	119	5.84034	2007	1	0	#DIV/0!	2007	82	18	4.55556
		"2002/01/01"[Publication Date] : "2002/12/31"[Publication Date] AND "thrombolysis"				"2007/01/01"[Publication Date] : "2007/12/31"[Publication Date] AND "vascular cell biology"				"2007/01/01"[Publication Date] : "2007/12/31"[Publication Date] AND ("visual system" AND "development")

## Sheet: signaling pathways extra
Signaling pathways extra
				K-RAS OR B-RAF				LKB				notch signalling or bHLH				hedgehog & signaling				TNF signaling				TNF				TGF-beta signaling				PTHrP
			year	all items	reviews	pub/rev ratio	year	all items	reviews	pub/rev ratio	year	all items	reviews	pub/rev ratio	year	all items	reviews	pub/rev ratio	year	all items	reviews	pub/rev ratio	year	all items	reviews	pub/rev ratio	year	all items	reviews	pub/rev ratio	year	all items	reviews	pub/rev ratio
			1957			#DIV/0!	1957			#DIV/0!	1957			#DIV/0!	1957			#DIV/0!	1957			#DIV/0!	1957			#DIV/0!	1957			#DIV/0!	1957			#DIV/0!
			1962			#DIV/0!	1962			#DIV/0!	1962			#DIV/0!	1962			#DIV/0!	1962			#DIV/0!	1962			#DIV/0!	1962			#DIV/0!	1962			#DIV/0!
			1967			#DIV/0!	1967			#DIV/0!	1967			#DIV/0!	1967			#DIV/0!	1967			#DIV/0!	1967			#DIV/0!	1967			#DIV/0!	1967			#DIV/0!
			1972			#DIV/0!	1972			#DIV/0!	1972			#DIV/0!	1972			#DIV/0!	1972			#DIV/0!	1972	1	0	#DIV/0!	1972			#DIV/0!	1972			#DIV/0!
			1977			#DIV/0!	1977			#DIV/0!	1977			#DIV/0!	1977			#DIV/0!	1977			#DIV/0!	1977	1	0	#DIV/0!	1977	0		#DIV/0!	1977			#DIV/0!
			1982	0	0	#DIV/0!	1982			#DIV/0!	1982	0	0	#DIV/0!	1982	0	0	#DIV/0!	1982	0	0	#DIV/0!	1982	10	3	3.33333	1982	14	0	#DIV/0!	1982			#DIV/0!
			1987	24	2	12	1987			#DIV/0!	1987	3	1	3	1987	0	0	#DIV/0!	1987	0	0	#DIV/0!	1987	528	52	10.1538	1987	214	14	15.2857	1987	6	0	#DIV/0!
			1992	87	9	9.66667	1992			#DIV/0!	1992	41	2	20.5	1992	3	0	#DIV/0!	1992	41	4	10.25	1992	2750	277	9.9278	1992	1296	188	6.89362	1992	119	18	6.61111
			1997	214	28	7.64286	1997	0	0	#DIV/0!	1997	197	23	8.56522	1997	62	13	4.76923	1997	278	24	11.5833	1997	4702	387	12.1499	1997	2252	255	8.83137	1997	176	29	6.06897
			2002	244	29	8.41379	2002	17	3	5.66667	2002	344	39	8.82051	2002	168	29	5.7931	2002	928	114	8.14035	2002	6834	836	8.17464	2002	2923	358	8.1648	2002	188	31	6.06452
			2007	463	65	7.12308	2007	81	13	6.23077	2007	637	77	8.27273	2007	344	78	4.41026	2007	1422	127	11.1969	2007	9679	971	9.96807	2007	4136	441	9.37868	2007	154	30	5.13333
				"2007/01/01"[Publication Date] : "2007/12/31"[Publication Date] AND ("K-RAS" OR "B-RAF")				"2007/01/01"[Publication Date] : "2007/12/31"[Publication Date] AND ("LKB1")				"1997/01/01"[Publication Date] : "1997/12/31"[Publication Date] AND ("notch signaling"OR "notch1" OR "bHLH" or "lin-12" OR "tan1")				"1982/01/01"[Publication Date] : "1992/12/31"[Publication Date] AND ("hedgehog" AND "signaling") OR ("hedgehog" and "segment polarity gene")				"2007/01/01"[Publication Date] : "2007/12/31"[Publication Date] AND (("TNF" AND "signaling") OR ("tumor necrosis factor" AND "signaling"))				"1987/01/01"[Publication Date] : "1987/12/31"[Publication Date] AND ("TNF" OR "tumor necrosis factor")				"1992/01/01"[Publication Date] : "1992/12/31"[Publication Date] AND ("TGF-beta" OR "transforming growth factor")				"1991/01/01"[Publication Date] : "1991/12/31"[Publication Date] AND ("PTHrP" OR "parathyroid hormone related protein")

## Sheet: all
All items in PubMed
	all
year	all items	reviews	pub/rev ratio
1957	110528	0	#DIV/0!
1962	125984	18	6999.11
1967	189280	5076	37.2892
1972	225390	6135	36.7384
1977	258527	6274	41.2061
1982	289538	9128	31.7198
1987	360898	21615	16.6966
1992	408880	41859	9.76803
1997	447014	54905	8.14159
2002	556605	69784	7.97611
2007	763041	86110	8.86124
