# Supplementary material for: The Dynamic Interest in Topics within the Biomedical Scientific Community
Source: PLoS One. 2009 Aug 7;4(8):e6544. doi: 10.1371/journal.pone.0006544 (PMC2721680; doi:10.1371/journal.pone.0006544)
Supplement: Table S2 — PubMed items on int-1 (0.03 MB XLS) [file pone.0006544.s002.xls]

## Sheet: Sheet1
PubMed items on int-1 after manual selection for topic
	(int-1)
year	selected items on int-1	items int-1 SJR > 3	items int-1 SJR > 1	% wnt or wingless SJR > 3	% Wnt or wingless SJR > 1
1982	1		1	0	100
1983	0		0
1984	5		5	0	100
1985	8		2	0	25
1986	9		6	0	66.6667
1987	17		13	0	76.4706
1988	13		8	0	61.5385
1989	16		10	0	62.5
1990	16		13	0	81.25
1991	14		8	0	57.1429
1992	7		4	0	57.1429
1993	6		1	0	16.6667
1994	3		2	0	66.6667
1995	3		0	0	0
1996	1		1	0	100
1997	1		0	0	0
PubMed search terms
all	(int1[All Fields] OR int-1[All Fields]) AND ("YYYY/01/01"[PDAT] : "YYYY/12/31"[PDAT])
SJR > 3	("YYYY/01/01"[PDAT] : "YYYY/12/31"[PDAT]) AND (("Cell"[Journal] OR "Science"[journal] OR "Nature"[journal] OR "Annual review of immunology"[Journal] OR "Annual Review of Cell and Developmental Biology"[Journal] OR "Nature Immunology"[Journal] OR "Nature Reviews Molecular Cell Biology"[Journal] OR "Nature Genetics"[Journal] OR "Ca-A Cancer Journal for Clinicians"[Journal] OR "Immunity"[Journal] OR…
